# Supplementary material for: Modelling the Transition towards a Carbon-Neutral Electricity System—Investment Decisions and Heterogeneity
Source: MDPI journal article supplement (doi:10.3390/en15010084), 2021-12-23
Supplement: s1 [file s1]

Archive with 1 entries (1 files):
- energies-1456843-supplementary.pdf
